# Supplementary material for: Occupancy history influences extinction risk of fossil marine microplankton groups
Source: Copernicus journal article supplement (doi:10.5194/egusphere-2024-2597), 2024-09-20
Supplement: Supplementary file 1 [file egusphere-2024-2597-supplement.pdf]

1 **Supplement to:**

2  
3 **Occupancy history influences extinction risk of fossil marine microplankton groups**

4  
5 Isaiah E. Smith\*, m T. Kocsis, Wolfgang Kiessling

6  
7 Department of Geography and Geosciences, GeoZentrum Nordbayern, Friedrich-Alexander-  
8 Universitt Erlangen-Nrnberg (FAU), Erlangen, Germany

9  
10 \* Corresponding author

11 Correspondence email: isaiah.em.smith@gmail.com

12  
13  
14  
15  
16  
17  
18  
19  
20  
21  
22  
23  
24  
25  
26

|                                    | With “gap-omission”<br>approach<br>(implemented in this<br>study) | Without “gap-omission”<br>approach |
|------------------------------------|-------------------------------------------------------------------|------------------------------------|
| <b>Foraminifera</b>                | 3437                                                              | 3039                               |
| <b>Calcareous<br/>Nannofossils</b> | 4756                                                              | 4189                               |
| <b>Radiolarians</b>                | 5522                                                              | 4853                               |
| <b>Diatoms</b>                     | 4767                                                              | 3962                               |

**Table S1.** The difference in the number of species-bin pairings with usable occupancy change and standing occupancy values for each data set binned to 1 million years, excluding occurrences occurring in bin = 1.

27

28

29

| <b>Bin size (Ma):</b>              | <b>0.1</b>            | <b>0.2</b>            | <b>0.5</b>            | <b>1.0</b>            |
|------------------------------------|-----------------------|-----------------------|-----------------------|-----------------------|
| <b>Foraminifera</b>                | <i>multiplicative</i> | <i>multiplicative</i> | <i>multiplicative</i> | <i>multiplicative</i> |
| <b>Calcareous<br/>Nannofossils</b> | <i>multiplicative</i> | <i>multiplicative</i> | <i>multiplicative</i> | <i>multiplicative</i> |
| <b>Radiolarians</b>                | <i>multiplicative</i> | <i>multiplicative</i> | <i>multiplicative</i> | <i>multiplicative</i> |
| <b>Diatoms</b>                     | <i>multiplicative</i> | <i>multiplicative</i> | <i>multiplicative</i> | <i>multiplicative</i> |

**Table S2.** The AIC-selected model formula for each group and bin size combination, on data that was processed without the “gap-omission” approach. “*multiplicative*” refers to the model with the formula:  $ex \sim oc * ch * p$ , and “*additive*” refers to the model with the formula:  $ex \sim oc + ch + p$ . “*ex*” represents the binary response variable *extinction*, “*oc*” represents the *occupancy* term, “*ch*” represents the *occupancy change* term, and “*p*” represents three-timer sampling probability.

30

31

32

33

34

35

36

37

38

39

40

41

| Simple Completeness Metric  |               |               |               |               |
|-----------------------------|---------------|---------------|---------------|---------------|
| Bin Size<br>(million years) | <b>0.1</b>    | <b>0.2</b>    | <b>0.5</b>    | <b>1.0</b>    |
|                             | <b>SCM</b>    | <b>SMC</b>    | <b>SCM</b>    | <b>SCM</b>    |
| Foraminifera                | 0.378 ± 0.007 | 0.470 ± 0.008 | 0.578 ± 0.012 | 0.664 ± 0.015 |
| Calcareous<br>Nannofossils  | 0.401 ± 0.006 | 0.493 ± 0.007 | 0.617 ± 0.010 | 0.711 ± 0.012 |
| Radiolarians                | 0.372 ± 0.006 | 0.485 ± 0.007 | 0.641 ± 0.009 | 0.749 ± 0.011 |
| Diatoms                     | 0.291 ± 0.006 | 0.388 ± 0.007 | 0.530 ± 0.010 | 0.640 ± 0.012 |

42 **Table S3.** Simple completeness metric (SCM, Benton 1987) calculations for each data set at  
43 each of the four examined bin sizes. Shown with standard error.  
44  
45

46

47

48

| Bin size<br>(Ma):                  | <b>0.1</b>            | <b>0.2</b>            | <b>0.5</b>            | <b>1.0</b>            |
|------------------------------------|-----------------------|-----------------------|-----------------------|-----------------------|
| <b>Foraminifera</b>                | <i>multiplicative</i> | <i>multiplicative</i> | <i>multiplicative</i> | <i>multiplicative</i> |
| <b>Calcareous<br/>Nannofossils</b> | <i>multiplicative</i> | <i>multiplicative</i> | <i>multiplicative</i> | <i>multiplicative</i> |
| <b>Radiolarians</b>                | <i>additive</i>       | <i>additive</i>       | <i>multiplicative</i> | <i>multiplicative</i> |
| <b>Diatoms</b>                     | <i>multiplicative</i> | <i>multiplicative</i> | <i>multiplicative</i> | <i>additive</i>       |

49 **Table S4.** The AIC-selected model formula for each group and bin size combination, on  
50 extinct-only data. “Multiplicative” refers to the three-term, multiplicative model. “Additive”  
51 refers to the three-term additive model.  
52  
53  
54

55

56

57

58

| Pearson correlation between total number of occupied Longhurst provinces and total number of occupied cells (corrected for autocorrelation) |            |            |            |            |
|---------------------------------------------------------------------------------------------------------------------------------------------|------------|------------|------------|------------|
| Bin Size (million years)                                                                                                                    | <b>0.1</b> | <b>0.2</b> | <b>0.5</b> | <b>1.0</b> |
| Foraminifera                                                                                                                                | 0.839      | 0.841      | 0.875      | 0.898      |
| Calcareous Nannofossils                                                                                                                     | 0.878      | 0.857      | 0.892      | 0.915      |
| Radiolarians                                                                                                                                | 0.713      | 0.736      | 0.792      | 0.822      |
| Diatoms                                                                                                                                     | 0.810      | 0.809      | 0.826      | 0.860      |

59 **Table S5.** Pearson correlation values between the total number of occupied Longhurst  
60 provinces and the total number of occupied cells for each taxonomic group at each bin size.  
61 All correlation coefficients were highly significant ( $p < 10^{-5}$ ).  
62

63

64

65

66

67

68

69

70

71

72

73

74

75

76

77

78

79

## Foraminifera

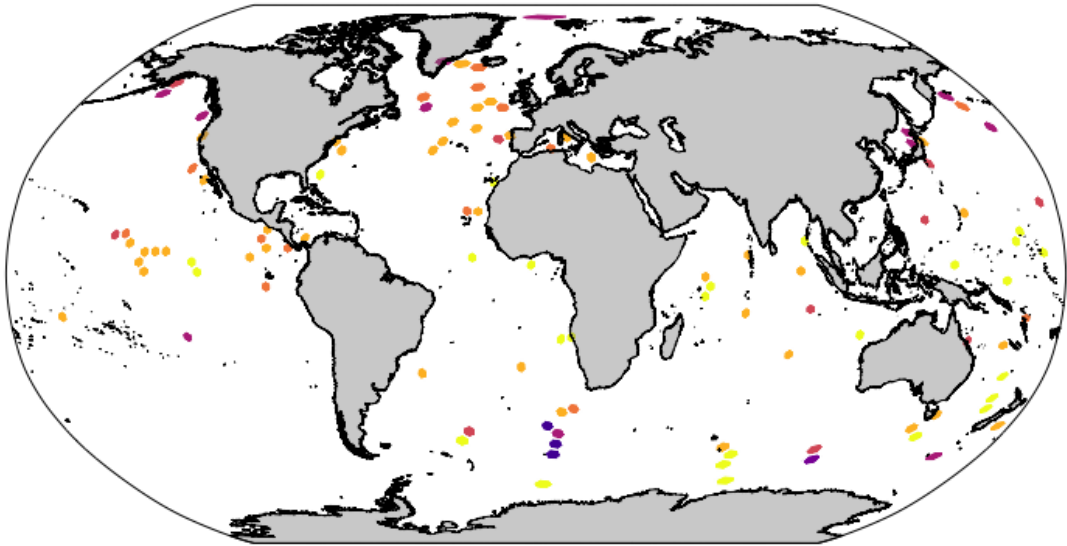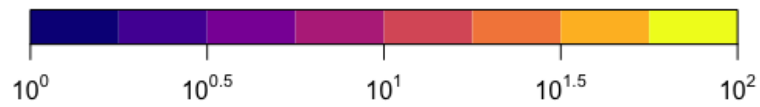

81

82 **Figure S1A.** Number of foraminifera occurrences in each geographic cell. Cells assigned  
83 according to each occurrence's modern geographic coordinates. White areas correspond to  
84 cells without records.  
85

## Calcareous Nannofossils

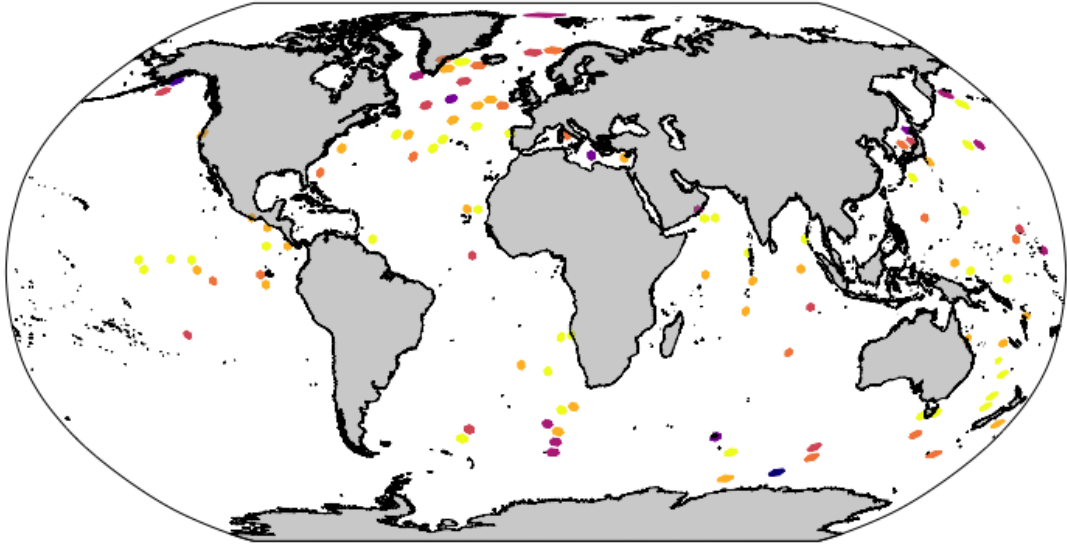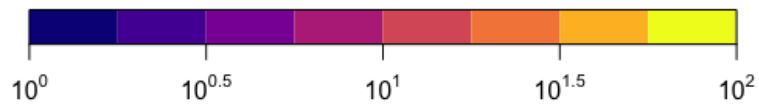

86

87 **Figure S1B.** Number of calcareous nannofossil occurrences in each geographic cell. Cells  
88 assigned according to each occurrence's modern geographic coordinates. White areas  
89 correspond to cells without records.

# Radiolarians

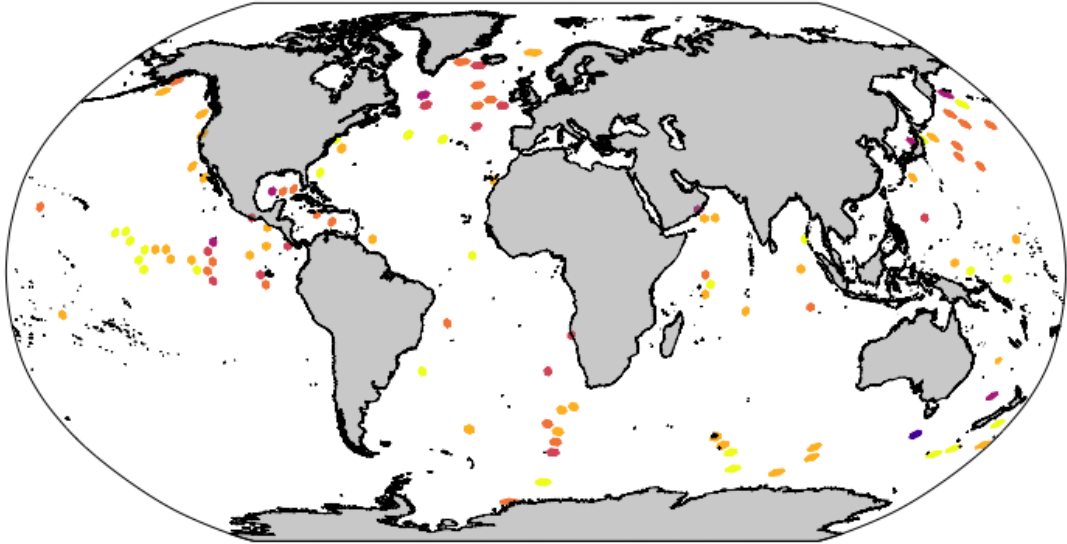

90

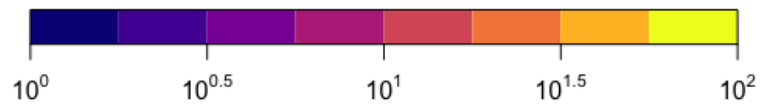

91 **Figure S1C.** Number of radiolarian occurrences in each geographic cell. Cells assigned  
92 according to each occurrence's modern geographic coordinates. White areas correspond to  
93 cells without records.  
94

# Diatoms

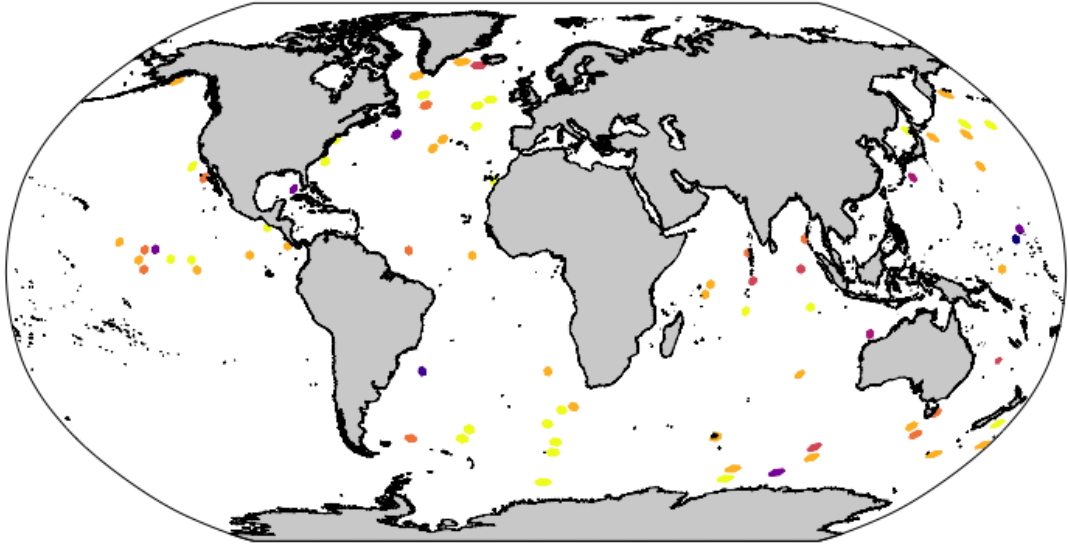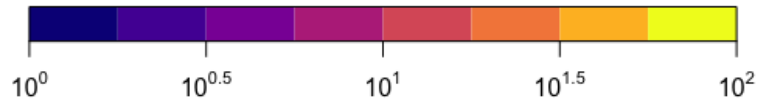

95

96 **Figure S1D.** Number of diatom occurrences in each geographic cell. Cells assigned  
97 according to each occurrence's modern geographic coordinates. White areas correspond to  
98 cells without records.



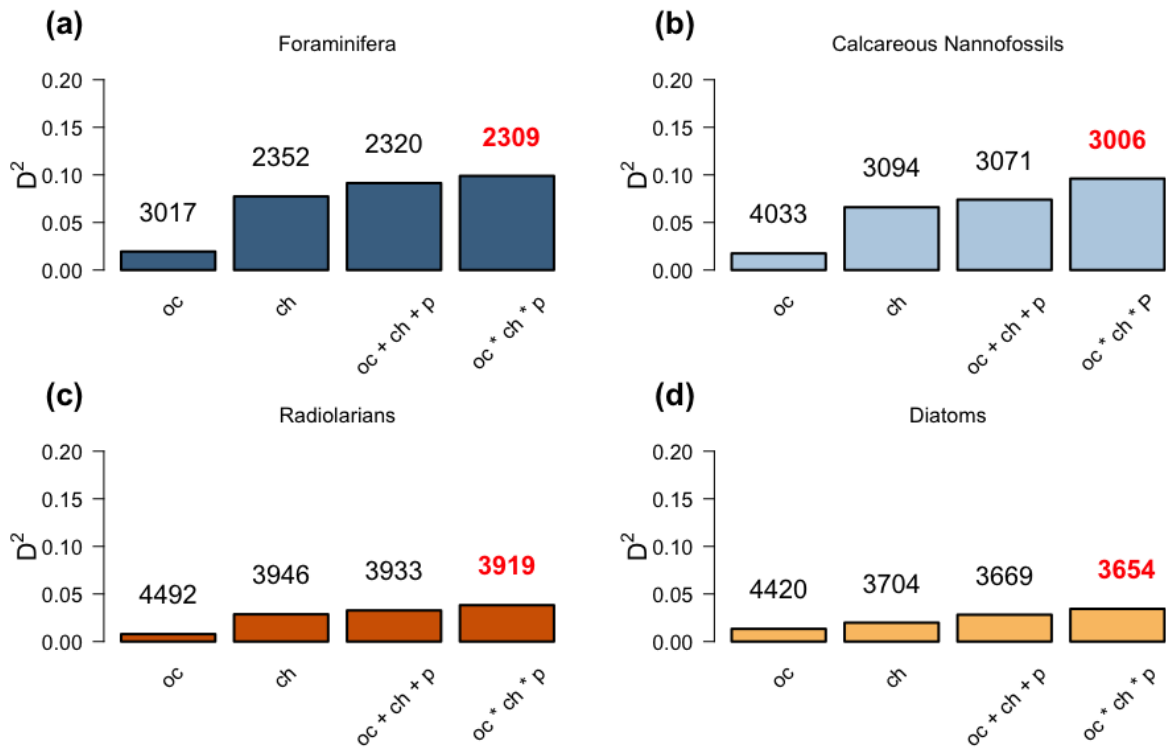

99 **Figure S2.**  $D^2$  values (bars) and AIC values (numbers displayed above each bar) for each  
 100 examined model formula using proportional occupancy of Longhurst provinces and change  
 101 in proportional occupancy of Longhurst provinces. Shown for each of the NSB data sets  
 102 with bin size = 1 million years. The lowest AIC value for each data set is shown in red.  
 103  
 104  
 105

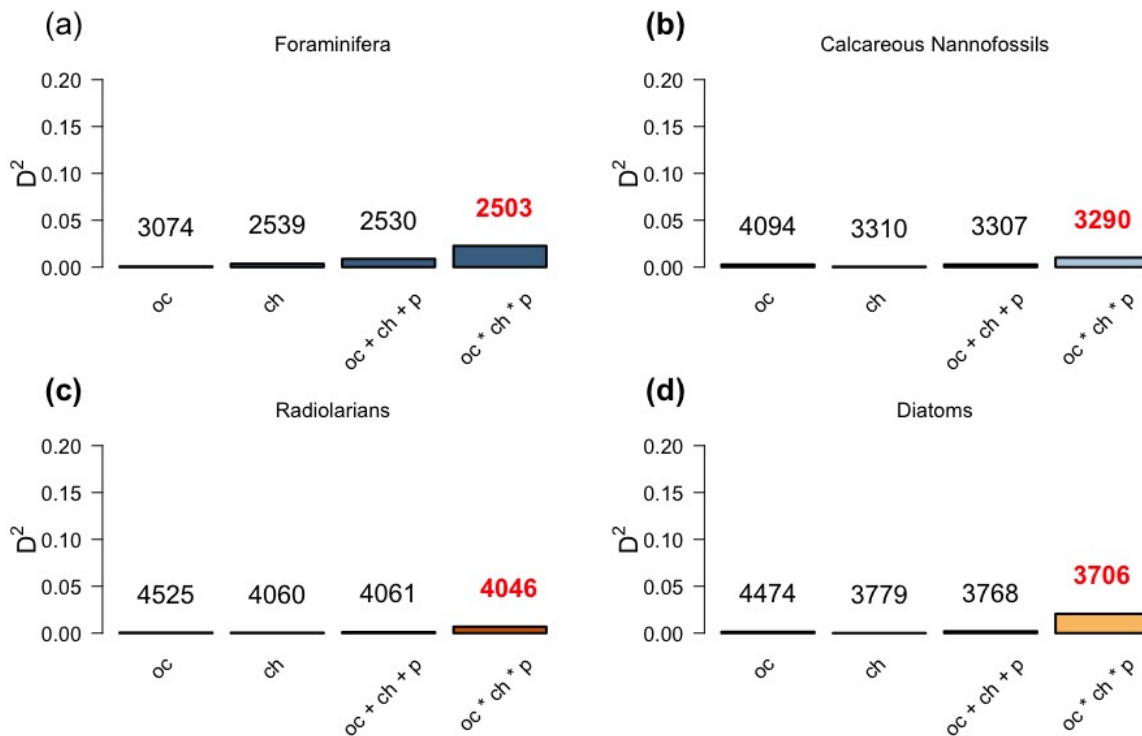

106 **Figure S3.**  $D^2$  values (bars) and AIC values (numbers displayed above each bar) for each  
 107 examined model formula using latitudinal range and change in latitudinal range. Shown for  
 108 each of the NSB data sets with bin size = 1 million years. The lowest AIC value for each  
 109 data set is shown in red.  
 110  
 111

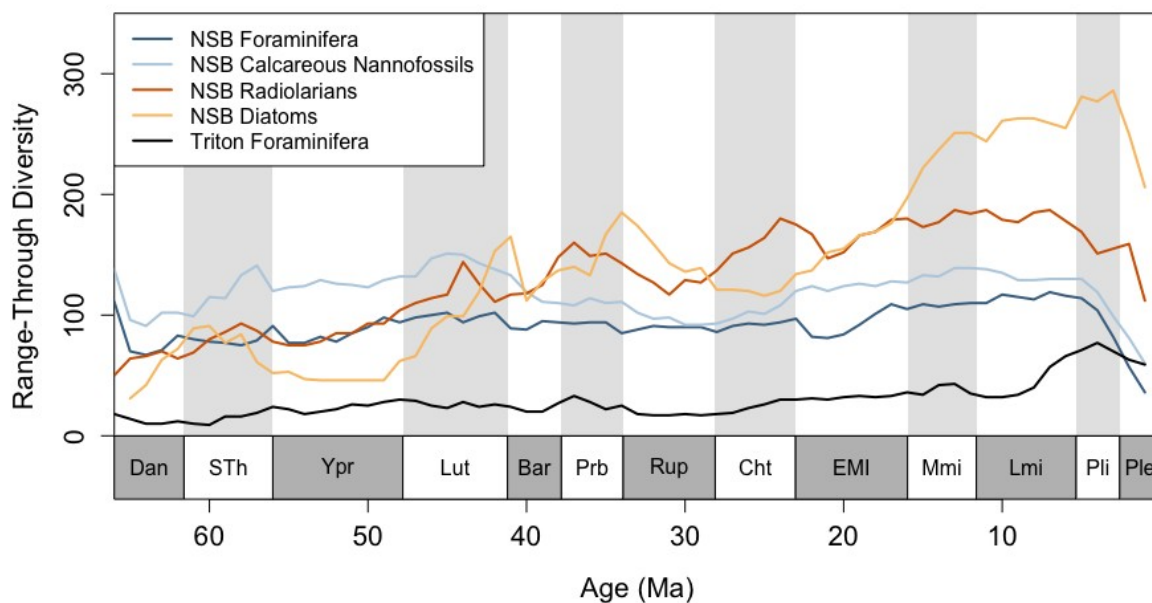

113  
 114 **Figure S4.** Range through diversity for each of the four NSB datasets and the Triton dataset,  
 115 using a bin size of 1.0 million years. Notice how the Triton dataset has consistently lower  
 116 diversity than the other four datasets. Also note the decrease in diversity approaching the  
 117 present, suggesting sampling issues at the tops of drill cores.  
 118

119  
 120  
 121  
 122

### Calcareous Nannofossils Occurrence Records

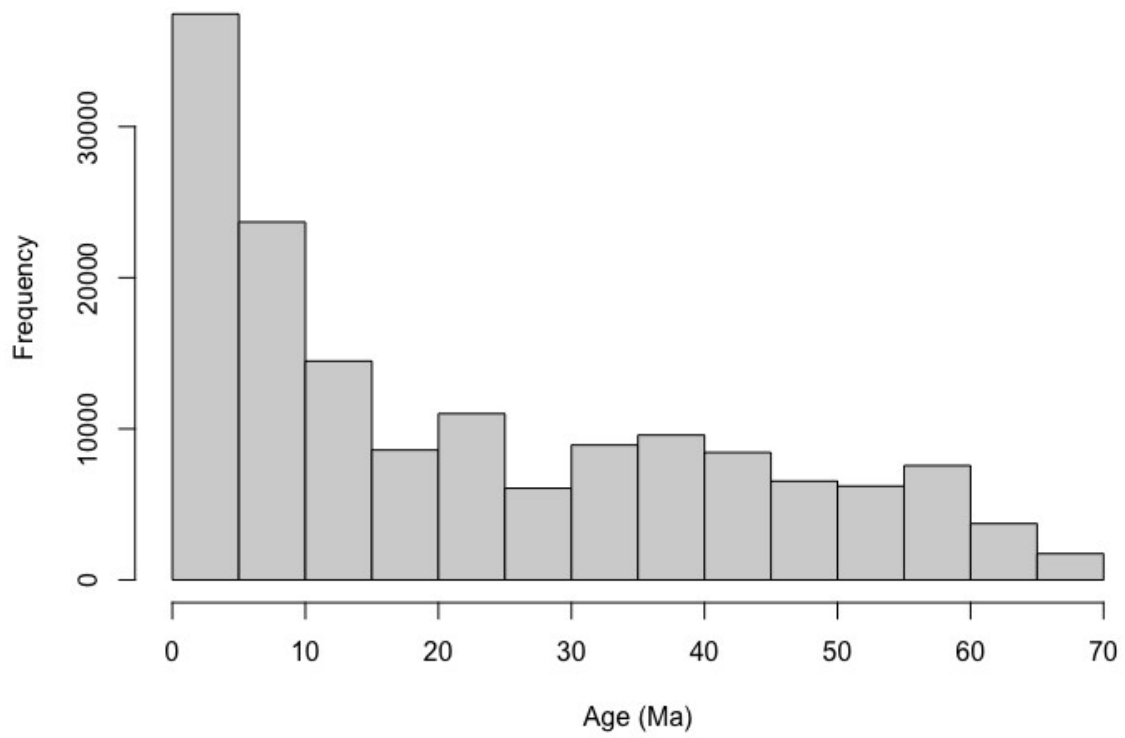

123  
124 **Figure S5A.** Histogram of occurrence frequency of NSB calcareous nannofossils.  
125  
126  
127  
128

### Foraminifera Occurrence Records

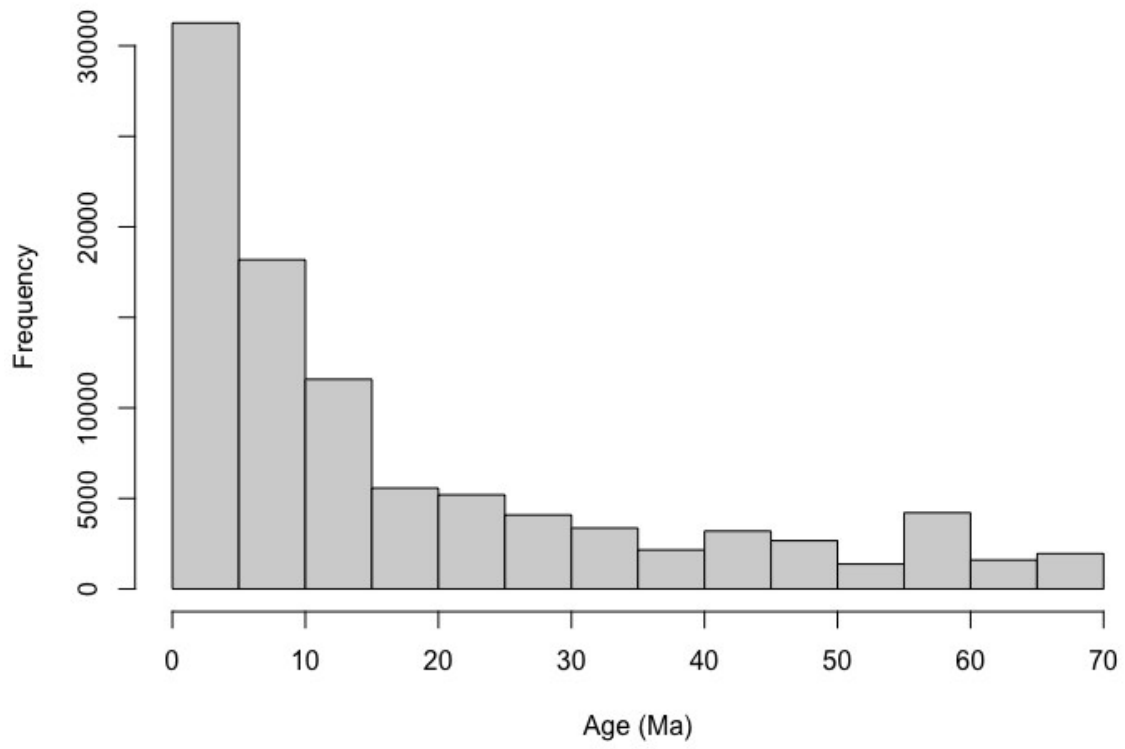

129  
130 **Figure S5B.** Histogram of occurrence frequency of NSB foraminifera.  
131  
132  
133  
134

### Diatom Occurrence Records

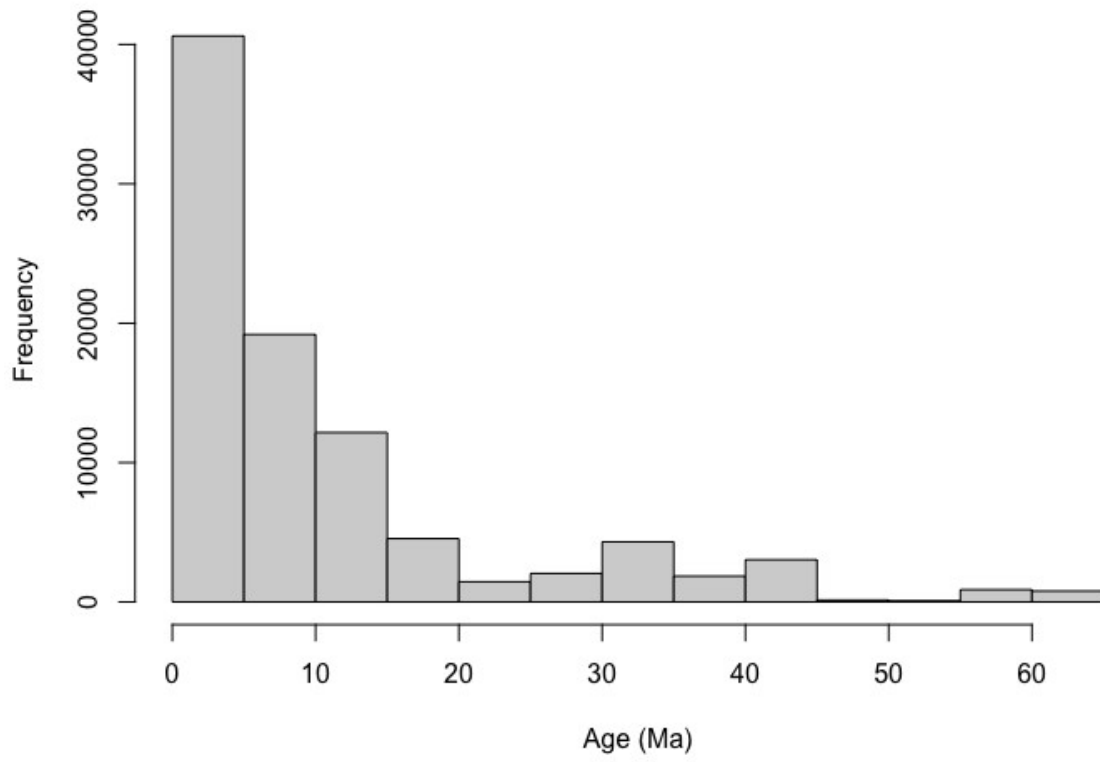

135  
136 **Figure S5C.** Histogram of occurrence frequency of NSB diatoms.  
137  
138  
139  
140

### Radiolarian Occurrence Records

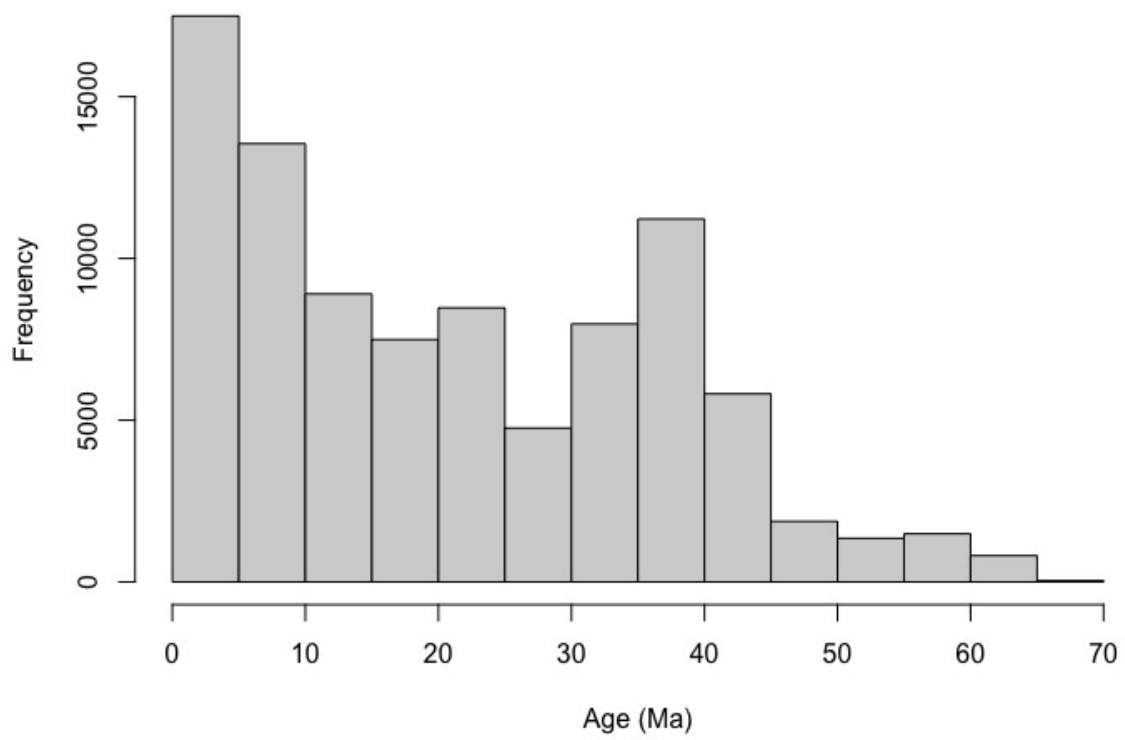

141  
142 **Figure S5D.** Histogram of occurrence frequency of NSB radiolarians.  
143

144  
145  
146  
147  
148  
149  
150  
151  
152  
153  
154  
155  
156  
157  
158  
159

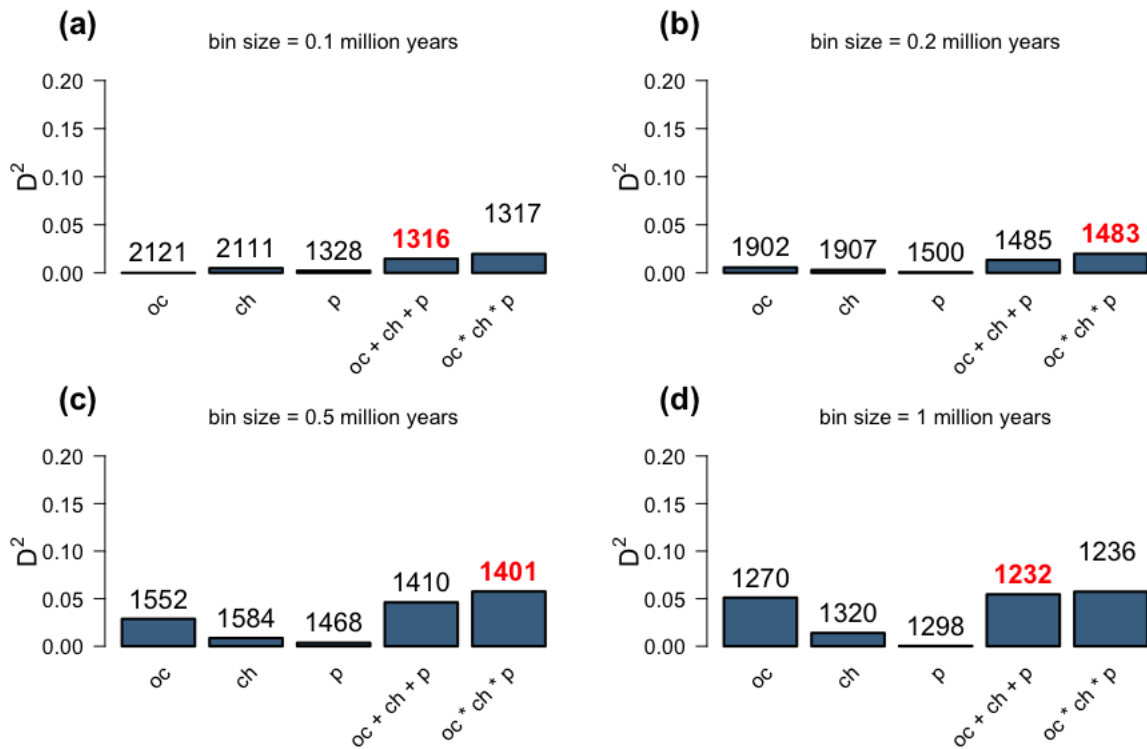

160  
 161  
 162  
 163  
 164  
 165  
 166  
 167  
 168  
 169  
 170  
 171  
 172

**Figure S6.**  $D^2$  values (bars) and AIC values (numbers displayed above each bar) for each examined model formula using the Triton dataset at each of the four analyzed bin sizes. The lowest AIC value for each data set is shown in red.
